1 **Associations between meteorological variables, vector indices and dengue**

2 **hospitalizations in Can Tho, Vietnam: a field survey**

3

4 Nguyen Phuong Toai<sup>1</sup>, Dang Van Chinh<sup>2</sup>, Nguyen Ngoc Huy<sup>3</sup>, Amy Y. Vittor<sup>4\*</sup>,

5

6 **Affiliations**

7

8 <sup>1</sup> Can Tho Medical College, Can Tho, Vietnam

9 <sup>2</sup> The Institute of Public Health in Ho Chi Minh City, Vietnam

10 <sup>3</sup> Vietnam National University – Vietnam Japan University, Hanoi, Vietnam (formerly at The Institute  
11 for Social and Environmental Transition, Boulder, Colorado, USA)

12 <sup>4</sup> The University of Florida, Gainesville, Florida, USA

13

14 **\*Corresponding Author**

15 Email: [amy.vittor@medicine.ufl.edu](mailto:amy.vittor@medicine.ufl.edu) (AV)

16

17 **Abstract**

18

19 **Introduction**

20 Dengue is a significant cause of morbidity and mortality in Can Tho, a province in the Mekong Delta  
21 in Vietnam. In this region, average temperatures have increased by 0.5°C since 1980, and river  
22 levels have risen. In a time-series analysis, we previously found that relative humidity was the most  
23 important meteorological predictor for dengue hospitalizations in Can Tho. To better understand  
24 proximate factors mediating this association, this study examines weather variables in relation to  
25 dengue hospitalization rates, vector indices, container productivity and larval elimination and  
26 mosquito avoidance behaviors.

27

28 **Methods**

29 Four hundred households were sampled bimonthly for one year in Can Tho. Vector indices of the  
30 immature forms of the dengue vector, *Aedes aegypti*, and the productivity of different types of  
31 household containers were determined. Dengue hospitalization rates were determined for the study  
32 period. Associations between these variables and mean temperature, relative humidity,  
33 precipitation, and the number of hours of sun were estimated using mixed effects Poisson  
34 regression analysis. Relative productivity of containers was determined by collecting *Ae. aegypti*  
35 pupae using a sweep method and adjusting by a calibration factor. *Ae. aegypti* larval density risk  
36 factors were determined using multivariate generalized estimating equations with a negative  
37 binomial distribution. To examine possible mechanisms mediating the relationship between climate,  
38 vectors and dengue, we also interviewed households about mosquito avoidance and larval  
39 elimination behaviors.

40

41 **Results**

42 The house- (HI), container- (CI), Breteau (BI), and pupal (PI) indices were associated with relative  
43 humidity (1-month lag,  $IRR_{HI}=1.10$  (95% CI 1.06, 1.13) per 1% increase),  $IRR_{CI}=1.10$  (95% CI 1.02,  
44 1.19),  $IRR_{BI}=1.17$  (95% CI 1.14, 1.21),  $IRR_{PI}=1.12$  (95% CI 1.10, 1.14)). Vector indices were also  
45 associated with precipitation (1-month lag) and to a lesser degree, hours of sun and mean  
46 temperature. *Ae. aegypti* larval density was associated with not cleaning water storage containers  
47 (RR=2.50, 95% CI 1.59, 3.66), not having access to municipal waste pick-up (RR=3.15, 95%  
48 CI 2.09, 4.75), disheveled clothes in the home (RR=1.85, 95% CI 1.24, 2.74) and season (RR[rainy  
49 season]=3.10, 95% CI 2.18-4.48). The most productive containers were water storage containers  
50 (relative pupal productivity 87%). Dengue hospitalization rates were associated with relative  
51 humidity (2-month lag,  $IRR=1.11$  (95% CI 1.06, 1.17) per 1% increase). Only the PI (1-month lag)  
52 was significantly associated with dengue hospitalization rates ( $IRR=1.04$ , 95% CI 1.00, 1.07).  
53 Mosquito avoidance behaviors were more frequent in the dry season (92.5% vs. 86.0% of  
54 interviewees endorsed one or more forms of mosquito prevention,  $p<0.001$ ). There was also less  
55 use of larval elimination strategies (39.2% vs. 50.5%,  $p<0.001$ ) during the rainy versus the dry  
56 season.

57

## 58 **Conclusion**

59 Our study reveals a strong effect of relative humidity on vector indices and dengue hospitalization  
60 rates. This may be due to the mosquito's vulnerability to desiccation, and the association warrants  
61 further study. Our findings also demonstrate, however, that during the rainy season when mosquito  
62 prevention is most needed, the use of fans, repellent coils and maintenance of water storage  
63 containers is actually reduced. Water storage containers were by far the most productive of pupae,  
64 and should be targeted in vector control activities.

65

66

67

68

## 69 **Author summary**

70

71 Climate plays an important role in the geographic distribution and burden of disease due to dengue,  
72 owing to the vector and virus' sensitivity to temperature, humidity, and rainfall. In the Mekong Delta  
73 in Vietnam, where dengue poses a significant health burden, average temperatures have increased  
74 by 0.5°C since 1980. To better understand the influence of climate on dengue, this study examines  
75 its influence on dengue hospitalization rates, vector breeding behavior and human mosquito  
76 avoidance behaviors. We sampled 400 households every 2 months for one year for the presence of  
77 the dengue vector, *Aedes aegypti*, and the productivity of different types of household containers.  
78 Human mosquito avoidance behaviors, such as the use of fans, mosquito repellent, and larval  
79 elimination strategies were also recorded. The association between dengue hospitalizations, mean  
80 temperature, relative humidity, precipitation, and the number of hours of sun were established, and  
81 risk factors for the abundance of *Ae. aegypti* larvae were determined. We found that relative  
82 humidity is positively associated with the presence of *Ae. aegypti* immature forms, and that large  
83 jars used for water storage serve as the most important source of this vector. We also determined  
84 that people engage in mosquito avoidance/larval elimination strategies more frequently in the dry  
85 season versus the rainy season, despite increased vector breeding and dengue hospitalizations  
86 during the rainy season. This temporal disconnect between peak vector activity and dengue  
87 hospitalization rates vis-à-vis mosquito control strategies is a potential area for intervention.

88

89

## 90 **Introduction**

91

92 Dengue fever is caused by one of four serotypes of dengue virus (family *Flaviviridae*, genus  
93 *flavivirus*), a single-stranded positive-sense RNA virus. It is transmitted by *Aedes* species  
94 mosquitoes and usually causes a self-limited febrile illness (classic dengue fever), characterized by  
95 fever, headache, retro-orbital pain, arthralgia, myalgia, and rash. Severe forms of dengue (dengue  
96 hemorrhagic fever and dengue shock syndrome) are rare, but disproportionately affect young  
97 children and may result in death. In the past several decades, the geographic range of dengue has  
98 expanded greatly and dengue is now endemic throughout the subtropics and tropics. Current  
99 estimates place yearly incidence at approximately 390 million cases[1]. The underlying causes for  
100 this expansion are thought to be due to increased human mobility, poorly planned urbanization, the  
101 breakdown of vector control programs, the lack of public health infrastructure, and climate change  
102 [2, 3].

103

104 In Vietnam, approximately 125,000 dengue cases occur yearly[4], and this disease accounts for a  
105 large portion of hospitalizations[4]. Over 70% of cases occur in the southern region of the country  
106 [4]. The city-province of Can Tho lies in this southern region on the Mekong Delta, and is subject to  
107 frequent flooding. Climate projections have estimated that by 2030, the business district of the city  
108 will be submerged under 50cm of water during the peak rainy season[5]. Furthermore, the average  
109 air temperature in the region has increased by 0.5°C since 1980, with a projected increase of 1.1-  
110 1.4°C by 2050[5]. There is strong motivation on part of the city leadership to understand the health  
111 effects of such projections. Since climate plays an important role in the geographic and temporal  
112 distribution of dengue[2, 6], it is important to gain a better understanding of the ways in which the  
113 vector responds to climate. In addition, understanding associations between behavioral elements  
114 (e.g. water storage habits, use of mosquito avoidance measures) and climate will provide important  
115 insights into the human landscape and possible intervention strategies.

116

117 Previously, we reported on the associations between dengue hospitalizations in this region and  
118 climate between 2004 and 2011 in a time-series analysis[7]. We found that the dengue  
119 hospitalization rate in Can Tho was significantly associated with relative humidity with a lag of one  
120 month. To better understand the entomological and behavioral factors that may be contributing to  
121 this association, we conducted this prospective study. Specifically, we analyze indices of immature  
122 forms of *Ae. aegypti*, dengue hospitalization rates, container productivity, and mosquito  
123 avoidance/larval elimination behaviors by weather variables.

124

125

## 126 **METHODS**

127

### 128 **Study setting and design**

129

130 The study was conducted in two districts in Can Tho from June 2012 to June 2013 (Figure 1). The  
131 City of Can Tho (10.0333°N, 105.7833°E) lies on the Hau River in the Mekong Delta and is a  
132 regional hub for commerce, education, and culture. It has a population of 1.2 million with a density  
133 of 868 people/km<sup>2</sup>[8]. The elevation throughout the city ranges from 0.8 to 1.5m above sea level.  
134 Can Tho's climate is tropical and monsoonal with an average annual temperature of 27°C. The  
135 rainy season usually occurs from May to November and provides 90% of the yearly rainfall, which  
136 averages 1600-2000mm. There are nine districts in Can Tho, which range from urban to rural.  
137 However, urbanization has been occurring at a rapid pace. Between 1999 and 2009, the urban  
138 population grew by 41.5%[9]. The two districts selected for this study are Ninh Kieu and Binh Thuy  
139 (Fig 1). The former lies in the heart of Can Tho city and is urban, while the latter is suburban/rural.

140

141 **Fig 1. Map of the study area, illustrating the six wards in the province of Can Tho that were**  
142 **sampled between June 2012 and June 2013.** Base layers were provided by the Department of

143 Information and Technology of Can Tho City in Can Tho City (<http://stnmt.cantho.gov.vn/ttqt>). Cai  
144 Khe, An Hoa, and An Binh (control) wards are in Ninh Kieu district; Long Hoa, Long Tuyen, and Tra  
145 Noc (control) wards are in Binh Thuy district.

146  
147 Two wards in each of the two districts were selected for the study (Ninh Kieu district: Cai Khe  
148 (popn 33,018) and An Hoa (popn 22,367) wards; Binh Thuy district: Long Hoa (popn 13,471) and  
149 Long Tuyen (popn 13,250) wards). A third ward in each district was sampled at the beginning and  
150 the end of the study as controls for the effect of visitation of study staff on larval abundance (Ninh  
151 Kieu district: An Binh ward (popn 30,041); Binh Thuy district: Tra Noc ward (popn 10,513)). One  
152 hundred households were randomly sampled within each study sector. 93.5 % of households  
153 approached agreed to participate in the study. Once consented, households were visited once  
154 every two months. At each visit, larval and pupal collections were conducted in conjunction with a  
155 survey of demographics, mosquito avoidance behaviors, and larval elimination strategies.

156

## 157 **Data collection**

158

159 **Entomological survey.** Larval and pupal surveys were conducted by fieldworkers sampling all  
160 water-containing elements in the selected households and the peridomestic environment. Container  
161 type and quantity were noted, and mosquito larvae and pupae were quantified. Larvae and pupae in  
162 small containers (<20L) were removed using a pipette, while immature mosquito stages were  
163 sampled in large containers (>20L) by using sweep nets according to the pupal survey method  
164 described in [10, 11]. Larvae were identified by entomological personnel at the Can Tho Preventive  
165 Medicine Center, while pupae were allowed to emerge and were then identified as adult  
166 mosquitoes. Various entomological indices were derived. The Breteau index (BI) is the number of  
167 positive containers per 100 houses sampled. The house index (HI) is the percentage of houses  
168 infested with larvae or pupae. The container index (CI) is the percentage of water-holding

169 containers infested with larvae or pupae. The pupal index (PI) is the number of pupae per 100  
170 households. The larval density (LD) was defined as the number of larvae per household. To assess  
171 the productivity of different container types, relative pupal productivity was calculated by dividing the  
172 number of pupae in a given container by the total number of pupae in all containers in the study  
173 area as described in [12].

174

175 **Dengue hospitalizations.** Monthly counts of dengue hospitalizations by study ward were obtained  
176 from the Can Tho Preventive Medicine Center. Case reporting to the health department is  
177 compulsory. Private clinics diagnosing severe dengue are required to send patients to government-  
178 run district- and province hospitals. Dengue is diagnosed by NS1 antigen tests in Can Tho's  
179 hospitals, and 7% of NS1 antigen positive cases are further tested by MAC ELISA, and 3% are  
180 tested by RT-PCR. Monthly hospitalization rates were determined by using the 2009 populations for  
181 each ward.

182

183 **Household survey.** The survey was administered to consenting residents, and featured questions  
184 pertaining to demographics, socioeconomics, health, and water storage and mosquito avoidance  
185 behavior. The survey was administered to each household bimonthly for the duration of the study.

186

187 **Meteorological data.** Monthly mean temperatures, relative humidity, precipitation data, and hours  
188 of sunshine were obtained from the Can Tho Meteorological Station.

189

190

## 191 **Statistical analysis**

192

193 Data was entered into EpiData (Lauritsen 2008), and analyzed using STATA v14 (College Station,  
194 TX, USA). To explore the seasonal differences in vector indices and dengue rates, two-sample t-



195 tests were first performed. Subsequently, the effects of individual meteorological factors on vector  
196 indices and dengue rates were examined using a mixed-effects Poisson regression. A mixed effects  
197 model was employed to account for ward-level variability (random effects) when estimating the  
198 association of meteorological variables (fixed effects). The possibility of a time lag (0-, 1-, 2-months)  
199 was explored by separately modeling each lag. The meteorological variables were highly  
200 correlated. To avoid issues related to collinearity, separate models were constructed for each  
201 meteorological variable and each outcome variable (vector indices and dengue hospitalization  
202 rates). The models were further examined by comparing random-slope and random intercept  
203 models using likelihood ratio tests. Akaike's information criterion (AIC) was employed for model  
204 selection.

205 Risk factors for *Ae. aegypti* larval density were modeled using generalized estimating  
206 equations (GEE) with a negative binomial distribution. Variables with a p-value of less than 0.25 in  
207 the univariate analysis were included in the model in a stepwise fashion, and maintained in the  
208 model if significant at the 0.05 level.

209 Larval and pupal indices and counts were used to determine container productivity. Since  
210 jars and cement tanks hold large volumes of water, the absolute count of larvae and pupae  
211 collected in a sweep in these containers was adjusted by a calibration factor (C-2Fs) assuming that  
212 water level is at two thirds the total capacity, as described in [13]. Mosquito avoidance and larval  
213 elimination behaviors were analyzed by season using a McNemar test for paired proportions. The  
214 maps were created using ArcMap 10.2.2 software by ESRI, using base layers provided by the  
215 Department of Information and Technology of Can Tho City in Can Tho City  
216 (<http://stnmt.cantho.gov.vn/ttqt>).

217

## 218 **Ethical considerations**

219

220 The study was approved by the Can Tho Department of Health Committee for Human Research  
221 (COA. No. 246/SYT, protocol No. 052/NCKH-SYT). Study participation was voluntary, and all adult  
222 participants provided informed consent. No children participated in this study.

223

## 224 RESULTS

225

### 226 Study participant and meteorological characteristics.

227 The households (n=400) were surveyed 7 times each over the course of 13 months. Additional  
228 control households (n=200) were sampled the first and last month of the study. Women comprised  
229 63.5% of those interviewed, and most participants were over 45 years of age (Table 1). The  
230 majority of participants had completed secondary education or higher (64.3%), and literacy levels  
231 were high. The availability of tap water and municipal waste pickups were good (88.3% and 70.3%,  
232 respectively), but not universal. It is also important to note that while tap water was widely available,  
233 frequent water shortages meant that tap water could not be relied upon continuously. Most  
234 households had between 4 and 6 inhabitants.

235

236 **Table 1. Study respondent characteristics (n=400 households).**

| Characteristics    |                       | Frequency (n) | %    |
|--------------------|-----------------------|---------------|------|
| Age                | 15-24 yrs             | 29            | 7.3  |
|                    | 25-34 yrs             | 45            | 11.3 |
|                    | 35-44 yrs             | 79            | 19.8 |
|                    | > 45 yrs              | 247           | 61.8 |
| Sex                | Male                  | 146           | 36.5 |
|                    | Female                | 121           | 63.5 |
| Literacy           | Illiterate            | 17            | 4.3  |
|                    | Literate              | 383           | 95.8 |
| Education          | Less than high school | 143           | 35.8 |
|                    | High school graduate  | 201           | 50.3 |
|                    | College graduate      | 56            | 14.0 |
| Piped water supply | No                    | 46            | 11.5 |
|                    | Yes                   | 353           | 88.3 |
| Municipal waste    | No                    | 118           | 29.5 |
|                    | Yes                   | 281           | 70.3 |

|                             |     |     |      |
|-----------------------------|-----|-----|------|
| No. inhabitants in the home | 1-3 | 111 | 27.8 |
|                             | 4-6 | 236 | 59.0 |
|                             | >=7 | 53  | 13.3 |

237  
238  
239  
240  
241  
242  
243  
244  
245  
246

Mean monthly temperatures were very constant throughout the study period, varying only by 1°C around the mean temperature of 27.7°C (Figure 2). Cumulative annual rainfall was 1135mm. Most of the precipitation occurred between May and October, accounting for 91% of the yearly total. Relative humidity was high throughout the year (annual mean 82%), ranging between 77% during the dry season and 88% during the rainy season. The monthly hours of sunshine ranged between 210 to 294 hours during the dry season, and 148 to 251 hours in the rainy season.

247 **Fig 2. Mean monthly temperature, precipitation, relative humidity, and hours of sun in Can**  
248 **Tho, Vietnam.**

249  
250

### ***Aedes aegypti* vector indices**

251 All vector indices were markedly higher during the rainy season (Figure 3). The house index (HI)  
252 ranged from 7.5% (95% CI 4.0, 11.0) in the dry season to 14.2% (10.5, 17.8) in the rainy season  
253 ( $p=0.01$ ). The container index (CI) was 1.3% (95% CI 0.8, 1.9) in the dry season and 2.8% (95% CI  
254 2.0, 3.6) in the rainy season ( $p=0.01$ ). The Breteau index (BI) was 8.3 (95% CI 4.0, 12.7) in the dry  
255 season, and 21.7 (95% CI 12.9, 30.5) in the rainy season ( $p=0.03$ ), and the pupal index (PI) was  
256 21.9 (95% CI 11.9, 32.0) in the dry season and 72.8 (95% CI 36.6, 108.9) in the rainy season  
257 ( $p=0.03$ ). There was a single outlier for PI, however. All PI values were between 0 and 111 with the  
258 exception of a single observation at 368. The mean larval density (number of larvae per household)  
259 (LD) was 2.2 (95% CI 1.7, 2.8) in the dry season and 6.7 (95% CI 5.5, 7.8) in the rainy season  
260 ( $p<0.001$ ). HI and CI were closely correlated ( $\rho=0.81$ ), and these were in turn moderately to  
261 strongly correlated with the Breteau index ( $\rho_{HI}=0.82$ ,  $\rho_{CI}=0.69$ ).

262

263 **Fig 3. Vector indices (house index, container index, Breteau index, pupal index) during the**  
 264 **study period in Can Tho, Vietnam.**

265

266 To examine the association between vector indices and meteorological factors in more  
 267 detail, mixed effects Poisson regression coefficients were estimated for 0-, 1-, and 2-month lags  
 268 (Table 2). The most pronounced associations were seen with relative humidity. Relative humidity  
 269 was positively associated with virtually all vector indices at all lags. Precipitation was also strongly  
 270 associated with all indices at 1-month lag, and variably associated at 0- and 2- month lags. The  
 271 monthly hours of sunshine were negative associated with HI, BI, and PI at 1-month lag.  
 272 Temperature was significantly correlated only with PI, and most strongly at a lag of 2-months. PI  
 273 was the only vector index that demonstrated a significant association with all four meteorological  
 274 factors. AIC were generated for each model. The 1-month lag models had the lowest AIC and thus  
 275 the best fit compared to the 0- and 2-month lag models.

276

277 **Table 2. Univariate mixed effects Poisson regression incidence rate ratios for vector indices**  
 278 **and meteorological factors with 0-, 1- and 2-month lags.** Bolded entries are statistically  
 279 significant.

280

|                          | Lag (months) | House index (IRR, 95% CI)            | Container index (IRR, 95% CI)       | Breteau index (IRR, 95% CI)          | Pupal index (IRR, 95% CI)            |
|--------------------------|--------------|--------------------------------------|-------------------------------------|--------------------------------------|--------------------------------------|
| Mean monthly temp (°C)   | 0            | 1.07<br>(0.84, 1.38)                 | 0.95<br>(0.54, 1.67)                | 0.93<br>(0.75, 1.14)                 | <b>1.18*</b><br><b>(1.05, 1.32)</b>  |
|                          | 1            | 1.07<br>(0.87, 1.31)                 | 0.96<br>(0.61, 1.50)                | 1.02<br>(0.86, 1.20)                 | <b>1.14*</b><br><b>(1.02, 1.27)</b>  |
|                          | 2            | 0.96<br>(0.74, 1.24)                 | 1.09<br>(0.63, 1.89)                | 0.98<br>(0.79, 1.21)                 | <b>1.33**</b><br><b>(1.16, 1.52)</b> |
| Precipitation (cm/month) | 0            | <b>1.01*</b><br><b>(1.00, 1.03)</b>  | 1.02<br>(0.99, 1.04)                | <b>1.02**</b><br><b>(1.01, 1.03)</b> | <b>1.02**</b><br><b>(1.02, 1.03)</b> |
|                          | 1            | <b>1.03**</b><br><b>(1.02, 1.04)</b> | <b>1.03*</b><br><b>(1.00, 1.06)</b> | <b>1.05**</b><br><b>(1.04, 1.06)</b> | <b>1.03**</b><br><b>(1.02, 1.04)</b> |
|                          | 2            | 1.02<br>(1.00, 1.04)                 | 1.01<br>(0.97, 1.06)                | <b>1.02**</b><br><b>(1.01, 1.04)</b> | <b>1.02**</b><br><b>(1.01, 1.03)</b> |
| Mean monthly             | 0            | <b>1.14**</b>                        | <b>1.15*</b>                        | <b>1.23**</b>                        | <b>1.22**</b>                        |

|                                   |   |                        |                       |                        |                        |
|-----------------------------------|---|------------------------|-----------------------|------------------------|------------------------|
| relative humidity (%)             |   | (1.09, 1.19)           | (1.04, 1.28)          | (1.18, 1.28)           | (1.19, 1.25)           |
|                                   | 1 | 1.10**<br>(1.06, 1.13) | 1.10*<br>(1.02, 1.19) | 1.17**<br>(1.14, 1.21) | 1.12**<br>(1.10, 1.14) |
|                                   | 2 | 1.09**<br>(1.04, 1.14) | 1.08<br>(0.98, 1.19)  | 1.16**<br>(1.12, 1.21) | 1.10**<br>(1.07, 1.12) |
| Sunshine (10hrs/month increments) | 0 | 1.02<br>(0.99, 1.07)   | 1.02<br>(0.94, 1.11)  | 1.04*<br>(1.00, 1.07)  | 1.02*<br>(1.01, 1.04)  |
|                                   | 1 | 0.95**<br>(0.92, 0.98) | 0.94<br>(0.88, 1.01)  | 0.90**<br>(0.88, 0.92) | 0.96**<br>(0.94, 0.97) |
|                                   | 2 | 1.09*<br>(1.01, 1.17)  | 1.11<br>(0.94, 1.31)  | 1.20**<br>(1.13, 1.28) | 1.02<br>(0.98, 1.06)   |

281

282 \* p<0.05

283 \*\* p≤0.001

284

285 The two communes that were only sampled the first and last months of the study period (June 2012  
286 and June 2013) demonstrated a lesser rate of decline in vector indices between these two time  
287 points compared to the regularly sampled communes. The ratio of HI (first month/last month) for the  
288 two communes sampled twice was 2.1 compared to 2.8 (p=0.36) for the regularly sampled  
289 communes. Similarly, the CI (first month/last month) was 2.0 vs 2.4 (p=0.37), the BI (first month/last  
290 month) was 2.8 vs 2.9 (p=0.48), the PI 1.5 versus 19.8 (p=0.27), and the LD (first month/last month)  
291 was 2.2 vs 3.9 (p=0.22), for the twice-sampled communes compared to the regularly sampled  
292 communes, respectively. While these results are not statistically significant, the effect of sampling  
293 monthly or bimonthly may have impacted the outcome by reducing the abundance of *Ae. aegypti*.

294

### 295 **Risk factors for *Ae. aegypti* larval density**

296 Multivariate analysis of risk factors associated with *Ae. aegypti* larval density demonstrated that  
297 larval density was positively associated with the rainy season (RR 3.1, 95% CI 2.18 – 4.48) , not  
298 cleaning water containers (RR 2.5, 95% CI 1.59 – 3.66), not having municipal waste management  
299 (RR 3.15, 95% CI 2.09 – 4.75), and having clothes disorganized in the home (RR 1.85, 95% CI 1.24  
300 – 2.74) (Table 3). Other behaviors and weather variables were not significantly associated with  
301 larval abundance upon controlling for these four factors.

302

303 **Table 3. Multivariate model of risk factors for *Aedes aegypti* larval abundance using**  
304 **generalized estimating equations.**

305

| Risk factor                           | RR, 95% CI          |
|---------------------------------------|---------------------|
| Cleaning the water storage containers |                     |
| Yes                                   | Reference           |
| No                                    | 2.50* (1.59, 3.66)  |
| Municipal waste management            |                     |
| Yes                                   | Reference           |
| No                                    | 3.15** (2.09, 4.75) |
| Clothes organized in the home         |                     |
| Yes                                   | Reference           |
| No                                    | 1.85** (1.24, 2.74) |
| Seasons                               |                     |
| Dry                                   | Reference           |
| Rainy                                 | 3.10** (2.18, 4.48) |

306

### 307 **Relative productivity of containers**

308 Indoor and outdoor household containers were sampled for *Ae. aegypti* larvae and pupae. In the  
309 rainy season, 14,240 containers were sampled (Table 4a). In the dry season, 6,291 containers were  
310 sampled (Table 4b). A total of 1,688 *Ae. aegypti* pupae were collected in the rainy season, with  
311 dramatically less in the dry season (263 pupae). Since water storage containers and cement tanks  
312 hold large volumes of water, the absolute count of pupae collected in a sweep was adjusted by a  
313 calibration factor (C-2Fs) assuming that water level is at two-thirds the total capacity[13]. In both  
314 seasons, the most productive containers were the water storage containers with a relative  
315 productivity of 87% and 88% in the rainy and dry seasons, respectively. This was followed by  
316 cement tanks (relative productivity 10% and 7% in the rainy and dry seasons). Other containers  
317 such as buckets, vases, and miscellaneous other containers were common, but none of these  
318 yielded many larvae nor pupae relative to the jars.

319

320 **Table 4. A) Container pupal productivity in the rainy season, and B) container pupal**  
321 **productivity in the dry season.**

322

323 **A. Rainy season**

| Container type           | No. containers | No. pupae (+) containers | No. pupae | Estimated No. pupae (calibration-2 factors (C-2Fs)) |                | % Containers with pupae (95% CI) | Relative productivity |
|--------------------------|----------------|--------------------------|-----------|-----------------------------------------------------|----------------|----------------------------------|-----------------------|
|                          |                |                          |           | C-2Fs                                               | Adj. No. pupae |                                  |                       |
| Cement tanks             | 519            | 24                       | 148       | 3                                                   | 444            | 4.6 (3.0 – 6.8)                  | 0.1                   |
| Water storage containers | 3795           | 192                      | 1208      | 3                                                   | 3624           | 5.1(4.4 – 5.8)                   | 0.87                  |
| Buckets                  | 4689           | 37                       | 145       | .                                                   | 145            | 0.8 (0.5 – 1.1)                  | <0.01                 |
| Vases                    | 937            | 5                        | 14        | .                                                   | 14             | 0.5 (0.2 – 1.2)                  | <0.01                 |
| Saucers                  | 290            | 5                        | 19        | .                                                   | 19             | 1.7 (0.6 – 4.0)                  | <0.01                 |
| Others                   | 4010           | 51                       | 154       | .                                                   | 154            | 1.3 (0.9 – 1.7)                  | 0.01                  |
| Total                    | 14240          | 314                      | 1688      |                                                     | 4166           | 2.2 (2.0 – 2.5)                  | 1.0                   |

324 **B. Dry season**  
325

| Container type           | No. containers | No. pupae (+) containers | No. pupae | Estimated No. pupae (calibration-2 factors (C-2Fs)) |                | % Containers with pupae (95% CI) | Relative productivity |
|--------------------------|----------------|--------------------------|-----------|-----------------------------------------------------|----------------|----------------------------------|-----------------------|
|                          |                |                          |           | C-2Fs                                               | Adj. No. pupae |                                  |                       |
| Cement tanks             | 212            | 4                        | 17        | 3                                                   | 51             | 1.9 (0.5 – 4.8)                  | 0.07                  |
| Water storage containers | 1554           | 44                       | 201       | 3                                                   | 603            | 2.9 (2.1 – 3.8)                  | 0.88                  |
| Buckets                  | 2212           | 6                        | 18        | .                                                   | 18             | 0.3 (0.1 – 0.6)                  | 0.03                  |
| Vases                    | 704            | .                        | .         | .                                                   | .              | .                                | .                     |
| Saucers                  | 86             | .                        | .         | .                                                   | .              | .                                | .                     |
| Others                   | 1523           | 8                        | 14        | .                                                   | 14             | 0.5 (0.2 – 1.0)                  | 0.02                  |
| Total                    | 6291           | 63                       | 263       |                                                     | 686            | 1.0 (0.8 – 1.3)                  | 1.0                   |

326  
327 **Dengue hospitalization rates**

328 The dengue hospitalization rate varied by ward and by month (Figure 4). Long Tuyen and An Hoa  
329 wards had the highest dengue hospitalization rates, averaging 15.7 (95%CI 9.9, 21.4) and 15.5  
330 (95%CI 7.6, 23.3) hospitalizations/month/100,000 population, respectively (Table 5). The other  
331 wards had rates similar to one another, averaging 5.9 to 13.2 hospitalizations/month/100,000

332 population. Peak hospitalizations occurred in August and December 2012 (17.9 and 18.8  
 333 hospitalizations/month/100,000 population, respectively) and nadirs occurred in February and May  
 334 2013 (2.4 and 3.3 hospitalizations/month/100,000 population, respectively).

335  
 336 The dry season had a mean monthly hospitalization rate of 8.5 (95%CI 5.0, 12.1), whereas the  
 337 rainy season had a mean of 12.8 (95%CI 8.6, 17.1) (p=0.13). Dengue rates were significantly  
 338 associated with most of the meteorological variables at 0-, 1- and 2-month lags (Table 5a). Models  
 339 with rainfall and relative humidity with a lag of 2-months had the lowest AIC. The only significant  
 340 association between dengue hospitalization rates and vector indices was observed for PI with a 2-  
 341 month lag (Table 5b).

342

343 **Fig 4. Monthly dengue hospitalization rates per 100,000 inhabitants for all wards, June 2012 –**  
 344 **June 2013.**

345

346 **Table 5. Univariate mixed effects Poisson regression incidence rate ratios for dengue**  
 347 **hospitalization rates, A) meteorological factors, and B) vector indices with 0-, 1- and 2-**  
 348 **month lags.**

349

| <b>A</b>                                          | Lag | Mean monthly temperature (°C)       | Precipitation (cm/month)             | Mean monthly relative humidity (%)   | Sunshine (10hr/month increments)    |
|---------------------------------------------------|-----|-------------------------------------|--------------------------------------|--------------------------------------|-------------------------------------|
| Dengue monthly hospitalization rate (per 100,000) | 0   | 1.31<br>(0.96, 1.80)                | 1.01<br>(0.99, 1.03)                 | <b>1.07*</b><br><b>(1.02, 1.13)</b>  | 0.98<br>(0.93, 1.02)                |
|                                                   | 1   | <b>1.38*</b><br><b>(1.00, 1.91)</b> | 1.01<br>(1.00, 1.03)                 | <b>1.10**</b><br><b>(1.04, 1.15)</b> | 0.99<br>(0.94, 1.04)                |
|                                                   | 2   | 0.98<br>(0.73, 1.33)                | <b>1.04**</b><br><b>(1.02, 1.05)</b> | <b>1.11**</b><br><b>(1.06, 1.17)</b> | <b>0.94*</b><br><b>(0.90, 0.99)</b> |

350

| <b>B</b>                       | Lag | HI                   | CI                   | BI (10 unit increments) | PI 10 unit increments) |
|--------------------------------|-----|----------------------|----------------------|-------------------------|------------------------|
| Dengue monthly hospitalization | 0   | 1.01<br>(0.95, 1.07) | 1.04<br>(0.80, 1.36) | 1.07<br>(0.95, 1.20)    | 1.02<br>(0.91, 1.13)   |
|                                | 1   | 1.03                 | 1.09                 | 1.14                    | <b>1.04*</b>           |



|                    |   |                      |                      |                      |                      |
|--------------------|---|----------------------|----------------------|----------------------|----------------------|
| rate (per 100,000) |   | (0.99, 1.07)         | (0.92, 1.30)         | (0.99, 1.30)         | <b>(1.00, 1.07)</b>  |
|                    | 2 | 1.01<br>(0.98, 1.05) | 1.02<br>(0.87, 1.18) | 1.10<br>(0.97, 1.25) | 1.01<br>(0.98, 1.04) |

351

352 \* p<0.05

353 \*\* p≤0.001

354

### 355 Mosquito avoidance behaviors by season

356 The percentage of people endorsing the use of mosquito avoidance behaviors was higher in the dry  
 357 season (92.5%) than the rainy season (86.0%) (Table 6). The most commonly used method was  
 358 the fan (80.0% in the dry season vs. 67.6% in the rainy season). Other common methods were  
 359 using mosquito repellent coil and spray. The use of coils was significantly lower during the rainy  
 360 season (47.2% in the dry season vs. 35.2% in the rainy season). Similarly, efforts to eliminate  
 361 larvae were more frequent in the dry season than the rainy season (50.5% vs. 39.2%). The most  
 362 common methods were cleaning and changing the water in the containers. The study participants  
 363 engaged in this activity, as well as most of the other larval elimination methods, more frequently in  
 364 the dry season than the rainy season.

365

366 **Table 6. Mosquito avoidance behaviors and breeding site elimination strategies by season**  
 367 **(McNemar test for paired proportions).**  
 368

| Characteristics                        | Dry season<br>(n=1197<br>interviews) |      | Rainy season<br>(n=1597<br>interviews) |      | OR (95% CI)                |
|----------------------------------------|--------------------------------------|------|----------------------------------------|------|----------------------------|
|                                        | N                                    | %    | N                                      | %    |                            |
| <b>Mosquito avoidance (any method)</b> |                                      |      |                                        |      |                            |
| Yes                                    | 1107                                 | 92.5 | 1373                                   | 86.0 | <b>1.08** (1.05, 1.10)</b> |
| No                                     | 90                                   | 7.5  | 224                                    | 14.0 | Ref.                       |
| Fan                                    |                                      |      |                                        |      |                            |
| Yes                                    | 958                                  | 80.0 | 1080                                   | 67.6 | <b>1.18** (1.13, 1.24)</b> |
| No                                     | 239                                  | 20.0 | 517                                    | 32.4 | Ref.                       |
| Mosquito repellent coil                |                                      |      |                                        |      |                            |
| Yes                                    | 565                                  | 47.2 | 562                                    | 35.2 | <b>1.34** (1.23, 1.47)</b> |
| No                                     | 632                                  | 52.8 | 1035                                   | 64.8 | Ref.                       |
| Mosquito repellent spray               |                                      |      |                                        |      |                            |
| Yes                                    | 437                                  | 36.5 | 598                                    | 37.4 | 0.97 (0.88, 1.07)          |
| No                                     | 760                                  | 63.5 | 998                                    | 62.5 | Ref.                       |
| Mosquito repellent electronic racket   |                                      |      |                                        |      |                            |

|     |                                              |      |      |      |      |                            |
|-----|----------------------------------------------|------|------|------|------|----------------------------|
| 369 | Yes                                          | 243  | 20.3 | 267  | 16.7 | <b>1.21* (1.04, 1.42)</b>  |
| 370 | No                                           | 954  | 79.7 | 1330 | 83.3 | Ref.                       |
| 371 | Air conditioner                              |      |      |      |      |                            |
| 372 | Yes                                          | 98   | 8.2  | 121  | 7.6  | 1.08 (0.84, 1.40)          |
| 373 | No                                           | 1099 | 91.8 | 1476 | 92.4 | Ref.                       |
| 374 | <b>Elimination larvae/pupae (any method)</b> |      |      |      |      |                            |
| 375 | Yes                                          | 605  | 50.5 | 626  | 39.2 | <b>1.29** (1.19, 1.4)</b>  |
| 376 | No                                           | 592  | 49.5 | 971  | 60.8 | Ref.                       |
|     | Changing water                               |      |      |      |      |                            |
|     | Yes                                          | 278  | 23.2 | 341  | 21.4 | 1.09 (0.95, 1.25)          |
| 377 | No                                           | 919  | 76.8 | 1256 | 78.6 | Ref.                       |
|     | Adding oil or salt to water                  |      |      |      |      |                            |
| 378 | Yes                                          | 15   | 1.3  | 20   | 1.3  | 1.0 (0.51, 1.95)           |
|     | No                                           | 1182 | 98.7 | 1577 | 98.7 | Ref.                       |
| 379 | Turning container upside down                |      |      |      |      |                            |
|     | Yes                                          | 146  | 12.2 | 157  | 9.8  | <b>1.24* (1.00, 1.53)</b>  |
| 380 | No                                           | 1051 | 87.8 | 1440 | 90.2 | Ref.                       |
|     | Cleaning container                           |      |      |      |      |                            |
| 381 | Yes                                          | 365  | 30.5 | 387  | 24.2 | <b>1.26** (1.11, 1.42)</b> |
|     | No                                           | 832  | 69.5 | 1210 | 75.8 | Ref.                       |
| 382 | Adding larvivorous fish                      |      |      |      |      |                            |
|     | Yes                                          | 62   | 5.2  | 77   | 4.8  | 1.07 (0.78, 1.49)          |
| 383 | No                                           | 1135 | 94.8 | 1520 | 95.2 | Ref.                       |

384 Dry season: Nov – Apr Rainy season: May – Oct

385 \* p<0.05

386 \*\* p≤0.001

387

## 388 Discussion

389

390 In this study, we describe associations between meteorological factors and a) vector indices, b)  
 391 dengue hospitalization rates, and c) mosquito avoidance behaviors in a dengue endemic region of  
 392 Vietnam. We show that relative humidity, in particular, is significantly associated with all of the  
 393 vector indices, as well as the dengue hospitalization rate. The link between vector indices and  
 394 dengue hospitalization rates is more tenuous, and only evident for the pupal index. Interestingly, the  
 395 rainy season was associated with a reduction in a variety of behaviors that serve to reduce  
 396 mosquito exposure or breeding, such as the use of fans, repellent coils and maintenance of water  
 397 storage containers. Furthermore, we found that these water storage containers were the most  
 398 important sources of *Ae. aegypti* pupa.

399 It has previously been shown that *Ae. aegypti* survival and fecundity are increased, and  
400 larval development accelerated, during periods of high humidity[14, 15]. Experimental studies have  
401 further demonstrated significantly higher dengue virus titers and an enhanced ability of the virus to  
402 proliferate within *Ae. aegypti* with increases in relative humidity[15]. We postulate that temperature  
403 in the Mekong Delta is largely within optimum range for vector breeding and viral dissemination  
404 throughout the year. A time-series analysis on regional differences in dengue incidence in Vietnam  
405 demonstrated that in Ho Chi Minh City (near Can Tho) where annual average temperature is 28°C,  
406 dengue incidence was positively associated with relative humidity, but negatively associated with  
407 temperature [16]. This stood in contrast to Hanoi (annual average temperature of 23.6°C), where  
408 the opposite was observed. This relationship between dengue transmission, temperature and  
409 humidity was modeled in a high-resolution profile of these factors across space in Peru [17]. Our  
410 findings are consistent with this study, which demonstrated that dengue transmission potential was  
411 dependent on the duration within an optimal temperature range and was amplified exponentially by  
412 high humidity [17].

413 In our study region, human behavior may also be contributing to the relationship between  
414 humidity, vector indices and dengue rates. Cleaning the large water storage containers may be  
415 quite cumbersome, especially when filled with water during the rainy season. However, it is exactly  
416 during the rainy season, when relative humidity and vector activity are high, that such maintenance  
417 is most needed. Pupal abundance is highest in these containers, accounting for the vast majority of  
418 *Ae. aegypti* pupae collected. Many households use these containers due to unreliable water supply,  
419 and they have been implicated previously as major sources of vector breeding[18]. Targeting  
420 productive containers for biological control with the copepod *Mesocyclops spp.* has been promoted  
421 in Northern and Central Vietnam[18] [19]. It has also been implemented in Southern Vietnam where  
422 disease burden is greatest, with great initial success[20]. However, subsequent studies noted  
423 challenges with the sustainability of this intervention in Southern Vietnam, due to the reluctance to

424 introduce organisms into drinking water [21]. In our study, we also found that larvivorous organisms  
425 such as copepods were rarely used.

426 Our multivariate model of larval density also highlights the importance of waste management  
427 and disheveled clothes in the house. The former has been borne out in other studies as well, which  
428 show that a lack of effective waste management increases the total number of *Ae. aegypti* breeding  
429 sites in disposable receptacles filled by rainfall [22-25]. In our study, however, disposable  
430 receptacles did not contribute much to pupal productivity, and the link between waste management  
431 and dengue infection remains undefined. The association between larval density and disorganized  
432 clothing in the house may be arising from the tendency of *Ae. aegypti* adult females to rest on  
433 clothing or on furniture below 1.5m while digesting a blood meal, preferably in bedrooms[26-28]. In  
434 fact, observing that *Ae. aegypti* females rest on clothing in dark locations while vacuum aspirating  
435 adult mosquitoes, Edman et al. fashioned resting boxes to mimic these conditions[29]. They found  
436 that boxes covered in black cloth were able to attract 20-70% of the adult *Ae. aegypti* population in  
437 a given house.

438 This study has several limitations. The entomological component of this study spans one year,  
439 which does not allow for the examination of longer term trends. Nonetheless, our findings with  
440 regards to the importance of relative humidity are consistent with time-series analyses for the  
441 region[7, 16]. Our use of dengue hospitalization rates no doubt represents only a small portion of  
442 dengue infections. While measuring dengue incidence would more accurately capture the outcome  
443 of interest, this endeavor requires active surveillance and is resource-intensive. Similarly, block-  
444 level indices of larval forms of *Ae. aegypti* do not tend to correlate as well with dengue transmission  
445 as the pupal and adult stage mosquito indicators[30]. Indeed, in our study the pupal index (with a  
446 1-month lag period), but not the larval indices, were significantly associated with dengue  
447 hospitalizations.

448 There is emerging evidence that exposure to infected mosquitoes occurs not only in and around  
449 the household, but also in public spaces[31, 32]. Here we focused on measuring domiciliary vector

450 indices exclusively, which does not fully capture dengue transmission risk for household members  
451 on a local scale. This may not have ultimately impacted our findings much, however, since we  
452 aggregated vector and dengue hospitalization data on the ward level, and further accounted for  
453 ward level heterogeneity in the mixed effects models.

454         Despite there still being many unanswered questions pertaining to the linkages between  
455 climate forecasts and projected changes in dengue transmission risk, there has been a shift in  
456 affected countries towards focusing on mitigation and adaptation. A recent special report issued by  
457 the Intergovernmental Panel on Climate Change indicated that low-lying coastal countries such as  
458 Vietnam are particularly vulnerable to impacts resulting from global warming of 1.5°C above pre-  
459 industrial levels[33]. Sea level rise and tidal flooding, rising temperatures, and extreme rainfall in  
460 southern Vietnam are already occurring[34], and downstream effects such as water shortages and  
461 salinity intrusion may already be impacting vector ecology. Current mitigation priorities in Vietnam  
462 include reducing carbon emissions, reforestation, improved water resources and waste  
463 management[35]. Some strategies to address these priorities may provide multiple health benefits,  
464 such as improving water supply and infrastructure, such that water storage will no longer be  
465 necessary. Prospectively measuring the impacts of such mitigation efforts on vector-borne disease  
466 indicators will provide valuable insight into the full extent of benefits conferred.

467         In conclusion, our study sought to link dengue and weather by examining multiple levels  
468 within the chain of causation, namely vector indices, pupal productivity, dengue hospitalization rates  
469 and mosquito avoidance and elimination measures. Our results indicate that relative humidity is a  
470 key weather variable in this area where temperatures are consistently within an optimal range for  
471 dengue transmission. We also found that large water storage containers are the source of the  
472 majority of *Ae. aegypti* pupae, and that these containers are maintained less frequently during the  
473 rainy season. Climate change projections forecast rising temperatures and flooding in this region of  
474 Vietnam. This will likely render this region vulnerable to water shortages, leading to more reliance

475 on storing water near the domicile. Further studies are warranted on how these factors will influence  
476 not only dengue but also other the transmission risk of other arboviruses vectored by *Ae. aegypti*.

477

## 478 **Acknowledgements**

479

480 We would like express our gratitude to the participants in this study. We are also indebted to Dr.  
481 Karoun Bagamian for producing the maps in this manuscript. We would like to express our  
482 appreciation for the Institute for Social and Environmental Transition (ISET), the Climate Change  
483 Coordination Office (CCCO), the Institute for Public Health in Ho Chi Minh, the Can Tho  
484 Department of Health, the Can Tho Preventive Medicine Center, Can Tho University of Medicine  
485 and Pharmacy, the Research Institute of Climate Change, Can Tho University, its collaborators in  
486 the health sector, and all of the individuals who have supported the implementation of this project.  
487 This project was funded by the Rockefeller Foundation.

488

## 489 **References**

490

- 491 1. Bhatt S, Gething PW, Brady OJ, Messina JP, Farlow AW, Moyes CL, et al. The global distribution and  
492 burden of dengue. *Nature*. 2013;496(7446):504-7. doi: 10.1038/nature12060. PubMed PMID: 23563266;  
493 PubMed Central PMCID: PMC3651993.
- 494 2. Thai KT, Anders KL. The role of climate variability and change in the transmission dynamics and  
495 geographic distribution of dengue. *Experimental biology and medicine*. 2011;236(8):944-54. doi:  
496 10.1258/ebm.2011.010402. PubMed PMID: 21737578.
- 497 3. Wilder-Smith A, Gubler DJ. Geographic expansion of dengue: the impact of international travel. *The*  
498 *Medical clinics of North America*. 2008;92(6):1377-90, x. doi: 10.1016/j.mcna.2008.07.002. PubMed PMID:  
499 19061757.
- 500 4. Organization WH. Action against dengue: dengue day campaigns across Asia. 2011.
- 501 5. Can Tho Climate change Steering Committee. Can Tho City Climate Change Resilience Plan. Can Tho,  
502 Vietnam 2010. p. 27.
- 503 6. Descloux E, Mangeas M, Menkes CE, Lengaigne M, Leroy A, Tehei T, et al. Climate-based models for  
504 understanding and forecasting dengue epidemics. *PLoS neglected tropical diseases*. 2012;6(2):e1470. doi:  
505 10.1371/journal.pntd.0001470. PubMed PMID: 22348154; PubMed Central PMCID: PMC3279338.
- 506 7. Toai N, Chinh D, Vittor AY, Huy N. Associations between Dengue Hospitalizations and Climate in Can  
507 Tho, Vietnam, 2001-2011 *Environment Asia*. 2016;9(2):55-63. doi: 10.14456/ea.2016.8.
- 508 8. General Statistics Office of Vietnam. Statistical Yearbook of Vietnam. 2013.
- 509 9. General Statistics Office of Vietnam. Statistical Yearbook of Vietnam, 2011. 2011.

- 510 10. TDR/World Health Organization. Operational Guide for Assessing the Productivity of *Aedes aegypti*  
511 Breeding Sites. Geneva, Switzerland 2011.
- 512 11. Knox TB, Yen NT, Nam VS, Gatton ML, Kay BH, Ryan PA. Critical evaluation of quantitative sampling  
513 methods for *Aedes aegypti* (Diptera: Culicidae) immatures in water storage containers in Vietnam. *Journal of*  
514 *medical entomology*. 2007;44(2):192-204. PubMed PMID: 17427686.
- 515 12. Manrique-Saide P, Che-Mendoza A, Arana B, Pilger D, Lenhart A, Kroeger A. Operational guide for  
516 assessing the productivity of *Aedes aegypti* breeding sites. Geneva: TDR/World Health Organization, 2011.
- 517 13. Romero-Vivas CM, Llinas H, Falconar AK. Three calibration factors, applied to a rapid sweeping  
518 method, can accurately estimate *Aedes aegypti* (Diptera: Culicidae) pupal numbers in large water-storage  
519 containers at all temperatures at which dengue virus transmission occurs. *Journal of medical entomology*.  
520 2007;44(6):930-7. PubMed PMID: 18047190.
- 521 14. Canyon DV, Hii JL, Muller R. Adaptation of *Aedes aegypti* (Diptera: Culicidae) oviposition behavior in  
522 response to humidity and diet. *Journal of insect physiology*. 1999;45(10):959-64. PubMed PMID: 12770289.
- 523 15. Thu HM, Aye KM, Thein S. The effect of temperature and humidity on dengue virus propagation in  
524 *Aedes aegypti* mosquitoes. *The Southeast Asian journal of tropical medicine and public health*.  
525 1998;29(2):280-4. PubMed PMID: 9886113.
- 526 16. Vu HH, Okumura J, Hashizume M, Tran DN, Yamamoto T. Regional differences in the growing  
527 incidence of dengue fever in Vietnam explained by weather variability. *Tropical medicine and health*.  
528 2014;42(1):25-33. doi: 10.2149/tmh.2013-24. PubMed PMID: 24808744; PubMed Central PMCID:  
529 PMC3965842.
- 530 17. Campbell KM, Haldeman K, Lehnig C, Munayco CV, Halsey ES, Laguna-Torres VA, et al. Weather  
531 Regulates Location, Timing, and Intensity of Dengue Virus Transmission between Humans and Mosquitoes.  
532 *PLoS neglected tropical diseases*. 2015;9(7):e0003957. doi: 10.1371/journal.pntd.0003957. PubMed PMID:  
533 26222979; PubMed Central PMCID: PMC4519153.
- 534 18. Kay B, Vu SN. New strategy against *Aedes aegypti* in Vietnam. *Lancet*. 2005;365(9459):613-7. doi:  
535 10.1016/S0140-6736(05)17913-6. PubMed PMID: 15708107.
- 536 19. Tun-Lin W, Lenhart A, Nam VS, Rebollar-Tellez E, Morrison AC, Barbazan P, et al. Reducing costs and  
537 operational constraints of dengue vector control by targeting productive breeding places: a multi-country  
538 non-inferiority cluster randomized trial. *Tropical medicine & international health : TM & IH*.  
539 2009;14(9):1143-53. doi: 10.1111/j.1365-3156.2009.02341.x. PubMed PMID: 19624476.
- 540 20. Sinh Nam V, Thi Yen N, Minh Duc H, Cong Tu T, Trong Thang V, Hoang Le N, et al. Community-based  
541 control of *Aedes aegypti* by using *Mesocyclops* in southern Vietnam. *The American journal of tropical*  
542 *medicine and hygiene*. 2012;86(5):850-9. doi: 10.4269/ajtmh.2012.11-0466. PubMed PMID: 22556087;  
543 PubMed Central PMCID: PMC3335693.
- 544 21. Tran TT, Olsen A, Viennet E, Sleigh A. Social sustainability of *Mesocyclops* biological control for  
545 dengue in South Vietnam. *Acta tropica*. 2015;141(Pt A):54-9. doi: 10.1016/j.actatropica.2014.10.006.  
546 PubMed PMID: 25312335.
- 547 22. Barrera R, Navarro JC, Mora JD, Dominguez D, Gonzalez J. Public service deficiencies and *Aedes*  
548 *aegypti* breeding sites in Venezuela. *Bulletin of the Pan American Health Organization*. 1995;29(3):193-205.  
549 PubMed PMID: 8520605.
- 550 23. Mazine CA, Macoris ML, Andrighetti MT, Yasumaro S, Silva ME, Nelson MJ, et al. Disposable  
551 containers as larval habitats for *Aedes aegypti* in a city with regular refuse collection: a study in Marilia, Sao  
552 Paulo State, Brazil. *Acta tropica*. 1996;62(1):1-13. PubMed PMID: 8971274.
- 553 24. Abeyewickreme W, Wickremasinghe AR, Karunatilake K, Sommerfeld J, Axel K. Community  
554 mobilization and household level waste management for dengue vector control in Gampaha district of Sri  
555 Lanka; an intervention study. *Pathog Glob Health*. 2012;106(8):479-87. doi:  
556 10.1179/2047773212Y.0000000060. PubMed PMID: 23318240; PubMed Central PMCID: PMC3541909.

- 557 25. Banerjee S, Aditya G, Saha GK. Household Wastes as Larval Habitats of Dengue Vectors: Comparison  
558 between Urban and Rural Areas of Kolkata, India. *PLoS one*. 2015;10(10):e0138082. doi:  
559 10.1371/journal.pone.0138082. PubMed PMID: 26447690; PubMed Central PMCID: PMC4598039.
- 560 26. Chadee DD. Resting behaviour of *Aedes aegypti* in Trinidad: with evidence for the re-introduction of  
561 indoor residual spraying (IRS) for dengue control. *Parasit Vectors*. 2013;6(1):255. doi: 10.1186/1756-3305-6-  
562 255. PubMed PMID: 24004641; PubMed Central PMCID: PMC47653.
- 563 27. Ball TS, Ritchie SR. Evaluation of BG-sentinel trap trapping efficacy for *Aedes aegypti* (Diptera:  
564 Culicidae) in a visually competitive environment. *Journal of medical entomology*. 2010;47(4):657-63.  
565 PubMed PMID: 20695282.
- 566 28. Dzul-Manzanilla F, Ibarra-Lopez J, Bibiano Marin W, Martini-Jaimes A, Leyva JT, Correa-Morales F, et  
567 al. Indoor Resting Behavior of *Aedes aegypti* (Diptera: Culicidae) in Acapulco, Mexico. *Journal of medical*  
568 *entomology*. 2017;54(2):501-4. doi: 10.1093/jme/tjw203. PubMed PMID: 28011725.
- 569 29. Edman J, Kittayapong P, Linthicum K, Scott T. Attractant resting boxes for rapid collection and  
570 surveillance of *Aedes aegypti* (L.) inside houses. *J Am Mosq Control Assoc*. 1997;13(1):24-7. PubMed PMID:  
571 9152871.
- 572 30. Cromwell EA, Stoddard ST, Barker CM, Van Rie A, Messer WB, Meshnick SR, et al. The relationship  
573 between entomological indicators of *Aedes aegypti* abundance and dengue virus infection. *PLoS neglected*  
574 *tropical diseases*. 2017;11(3):e0005429. doi: 10.1371/journal.pntd.0005429. PubMed PMID: 28333938;  
575 PubMed Central PMCID: PMC5363802.
- 576 31. Liebman KA, Stoddard ST, Reiner RC, Jr., Perkins TA, Astete H, Sihuincha M, et al. Determinants of  
577 heterogeneous blood feeding patterns by *Aedes aegypti* in Iquitos, Peru. *PLoS neglected tropical diseases*.  
578 2014;8(2):e2702. doi: 10.1371/journal.pntd.0002702. PubMed PMID: 24551262; PubMed Central PMCID:  
579 PMC3923725.
- 580 32. Harrington LC, Fleisher A, Ruiz-Moreno D, Vermeylen F, Wa CV, Poulson RL, et al. Heterogeneous  
581 feeding patterns of the dengue vector, *Aedes aegypti*, on individual human hosts in rural Thailand. *PLoS*  
582 *neglected tropical diseases*. 2014;8(8):e3048. doi: 10.1371/journal.pntd.0003048. PubMed PMID: 25102306;  
583 PubMed Central PMCID: PMC4125296.
- 584 33. IPCC. Global warming of 1.5°C. An IPCC Special Report on the impacts of global warming of 1.5°C  
585 above pre-industrial levels and related global greenhouse gas emission pathways, in the context of  
586 strengthening the global response to the threat of climate change, sustainable development, and efforts to  
587 eradicate poverty. Geneva, Switzerland: World Meteorological Organization, 2018.
- 588 34. Tran Thuc, Nguyen Van Thang, Huynh Thi Lan Huong, Mai Van Khiem, Nguyen Xuan Hien, Phong DH.  
589 Climate change and sea level rise scenarios for Viet Nam. Ha Noi, Vietnam: Ministry of Natural Resources  
590 and Environment, 2016.
- 591 35. Sustainable Development Department VCO. Climate-resilient development in Vietnam: Strategic  
592 directions for the World Bank. Vietnam: The World Bank; 2011. p. 115.

593

### 594 **Supporting Information Legends**

595

596 S1. Monthly dengue hospitalization rates in study districts in Can Tho, Vietnam, 2012-2013.

597

598 S2. Monthly larval indices and weather variables in Can Tho, Vietnam, 2012-2013.

599

600 S3. Illustration of water storage containers



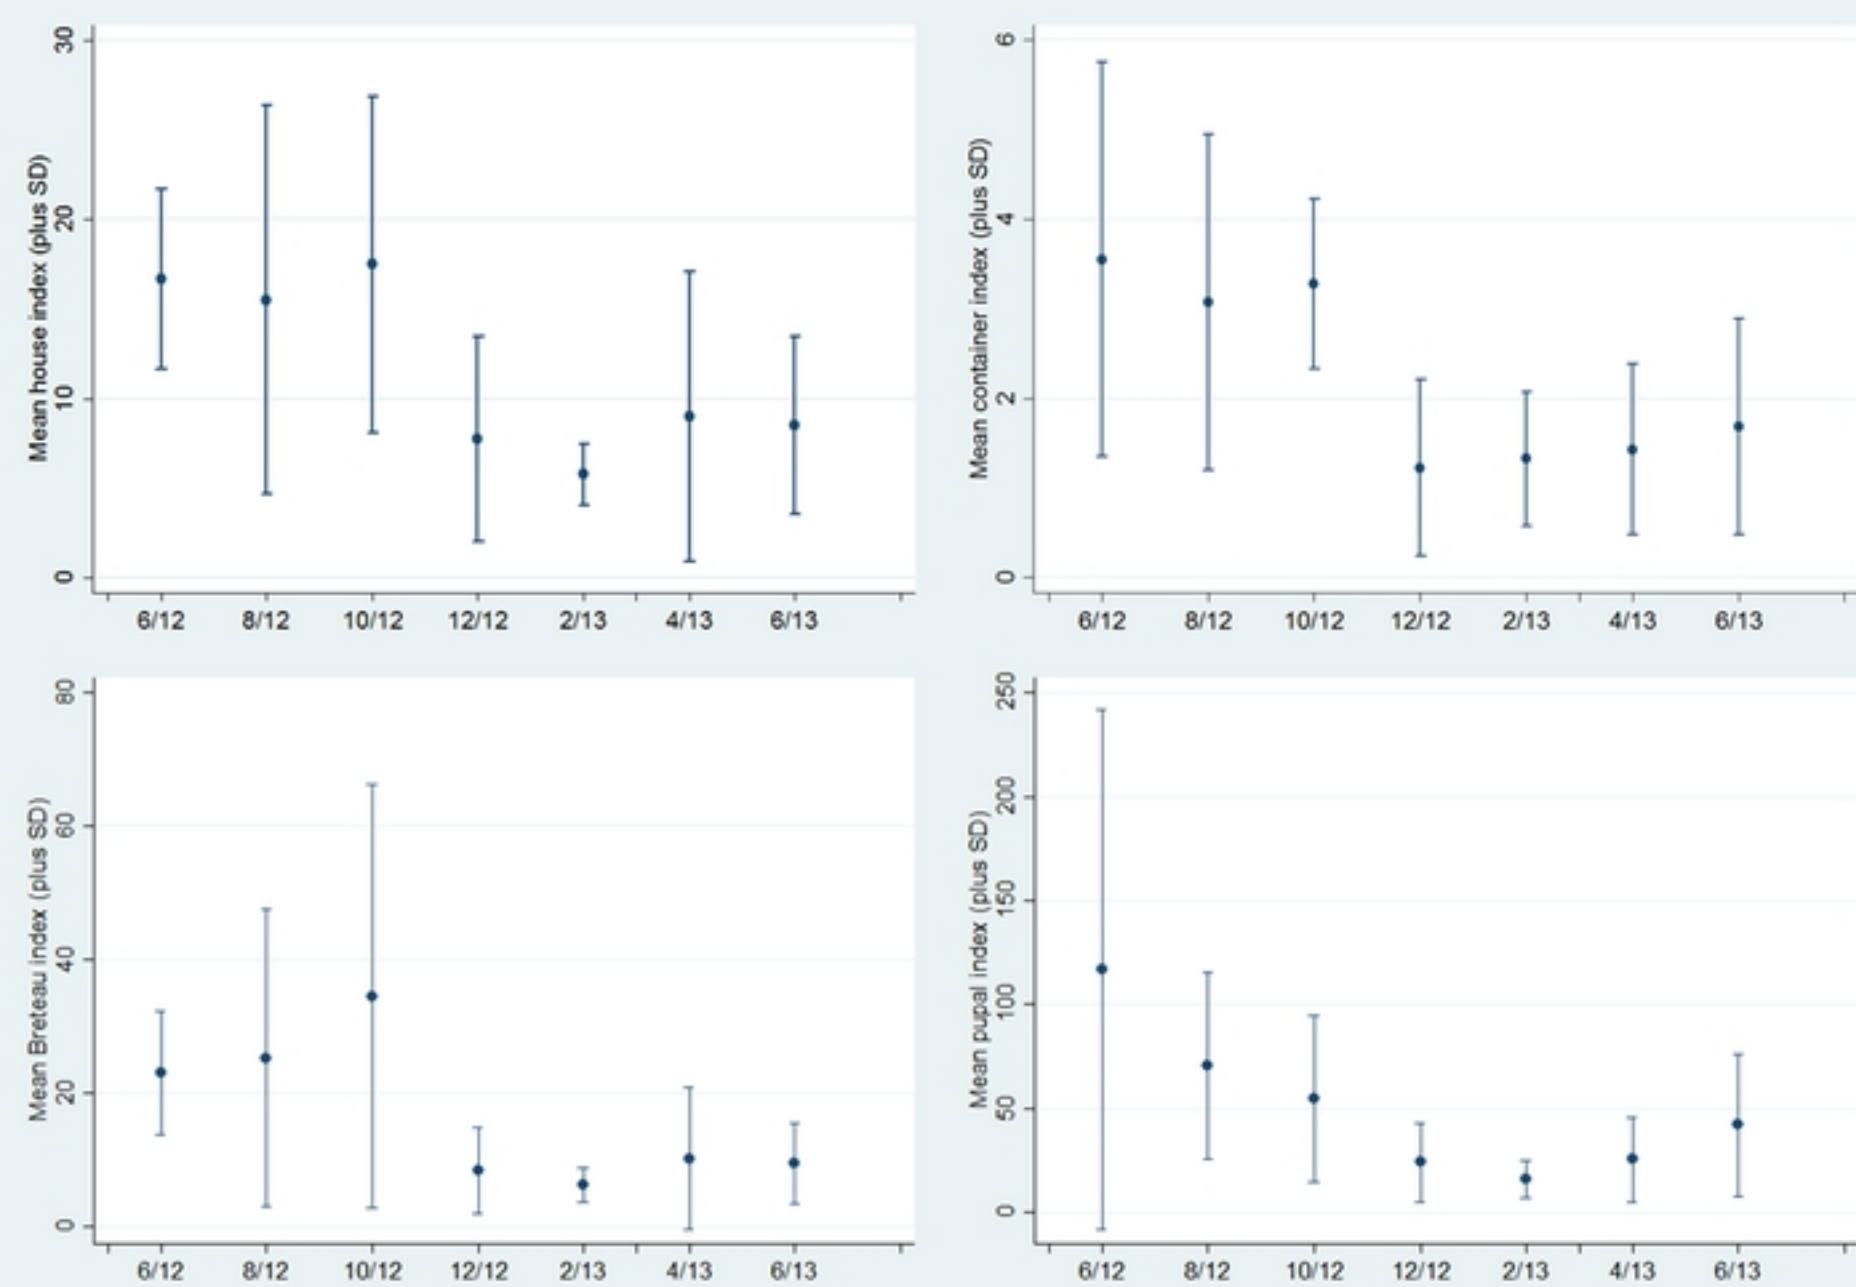

Fig3

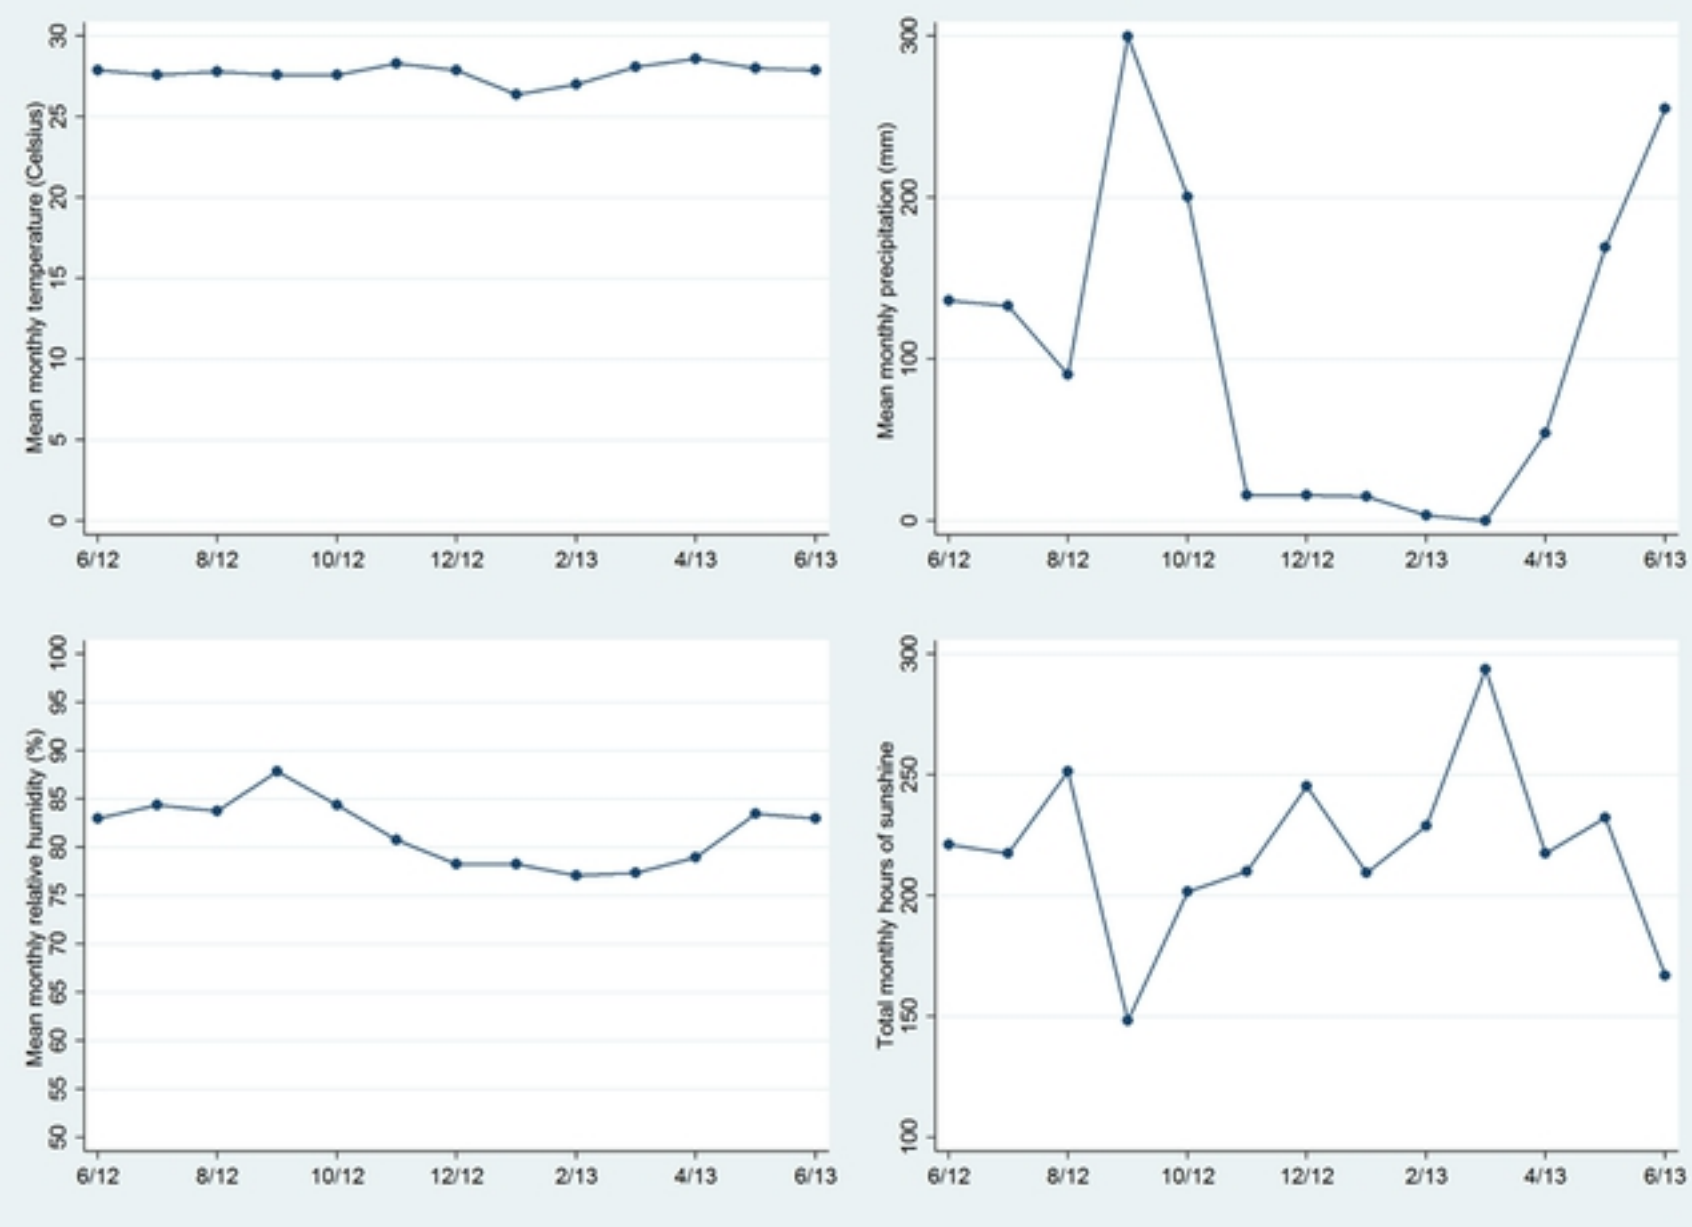

Fig2

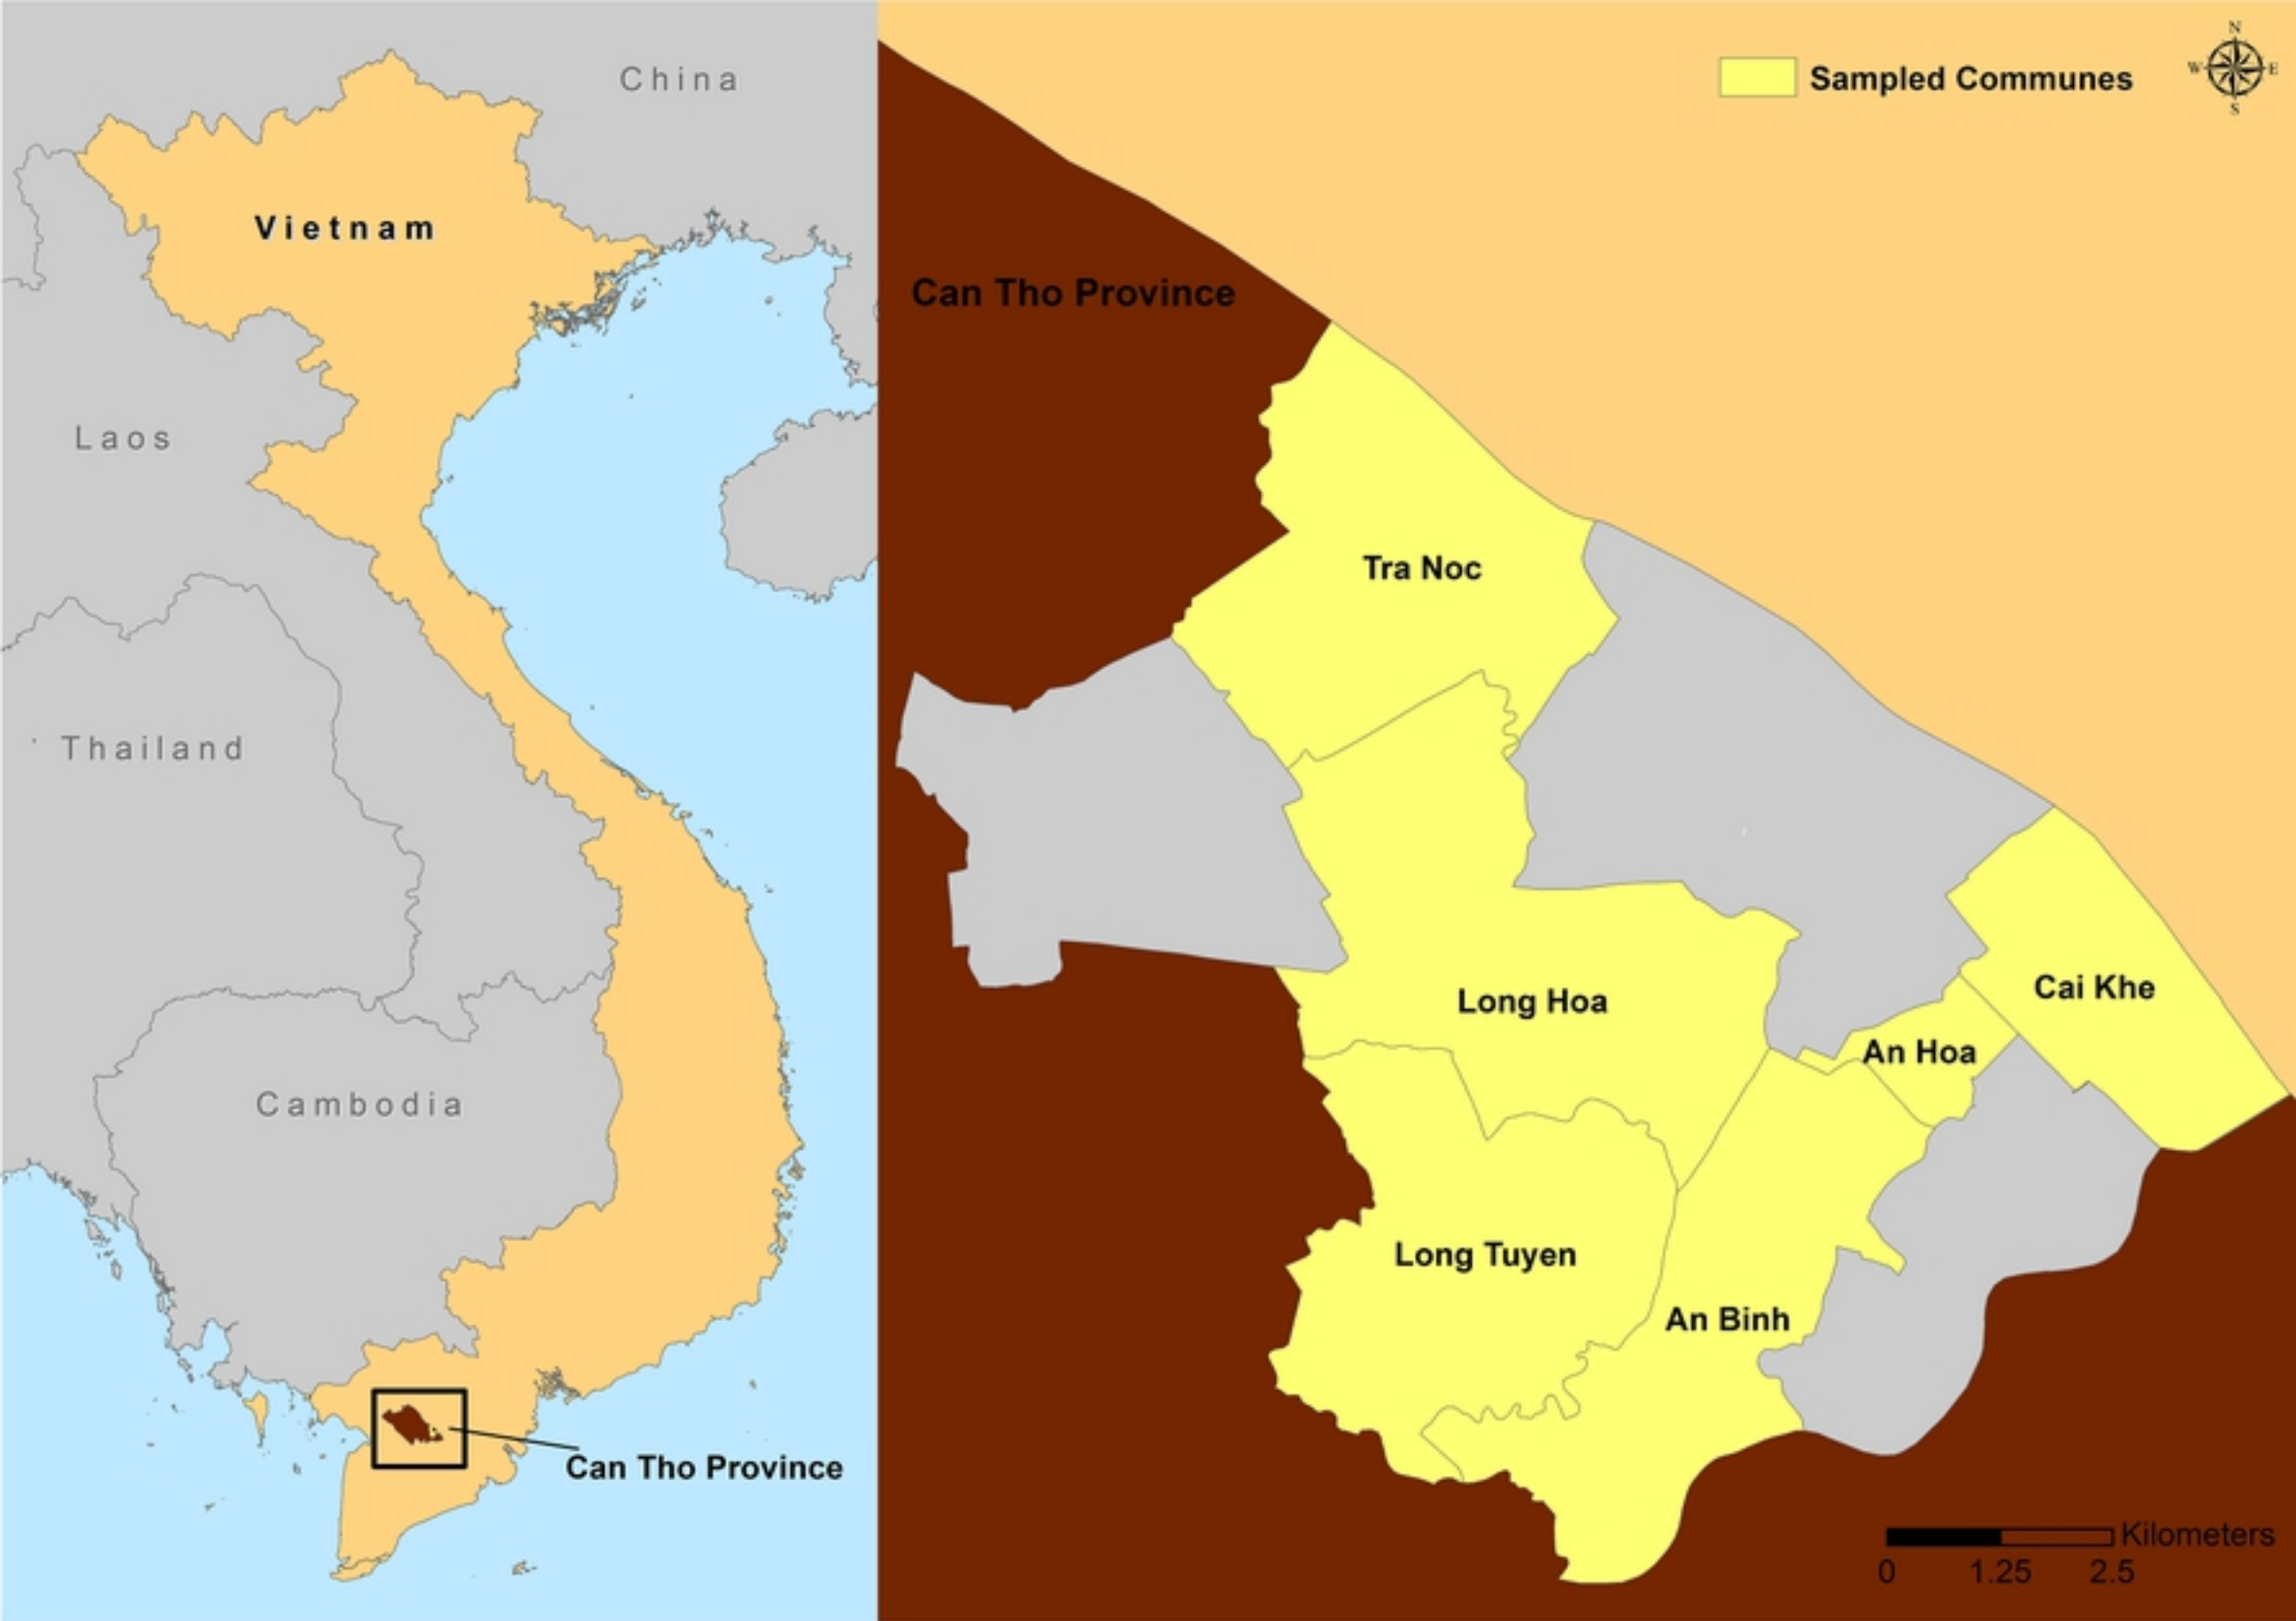

Fig1

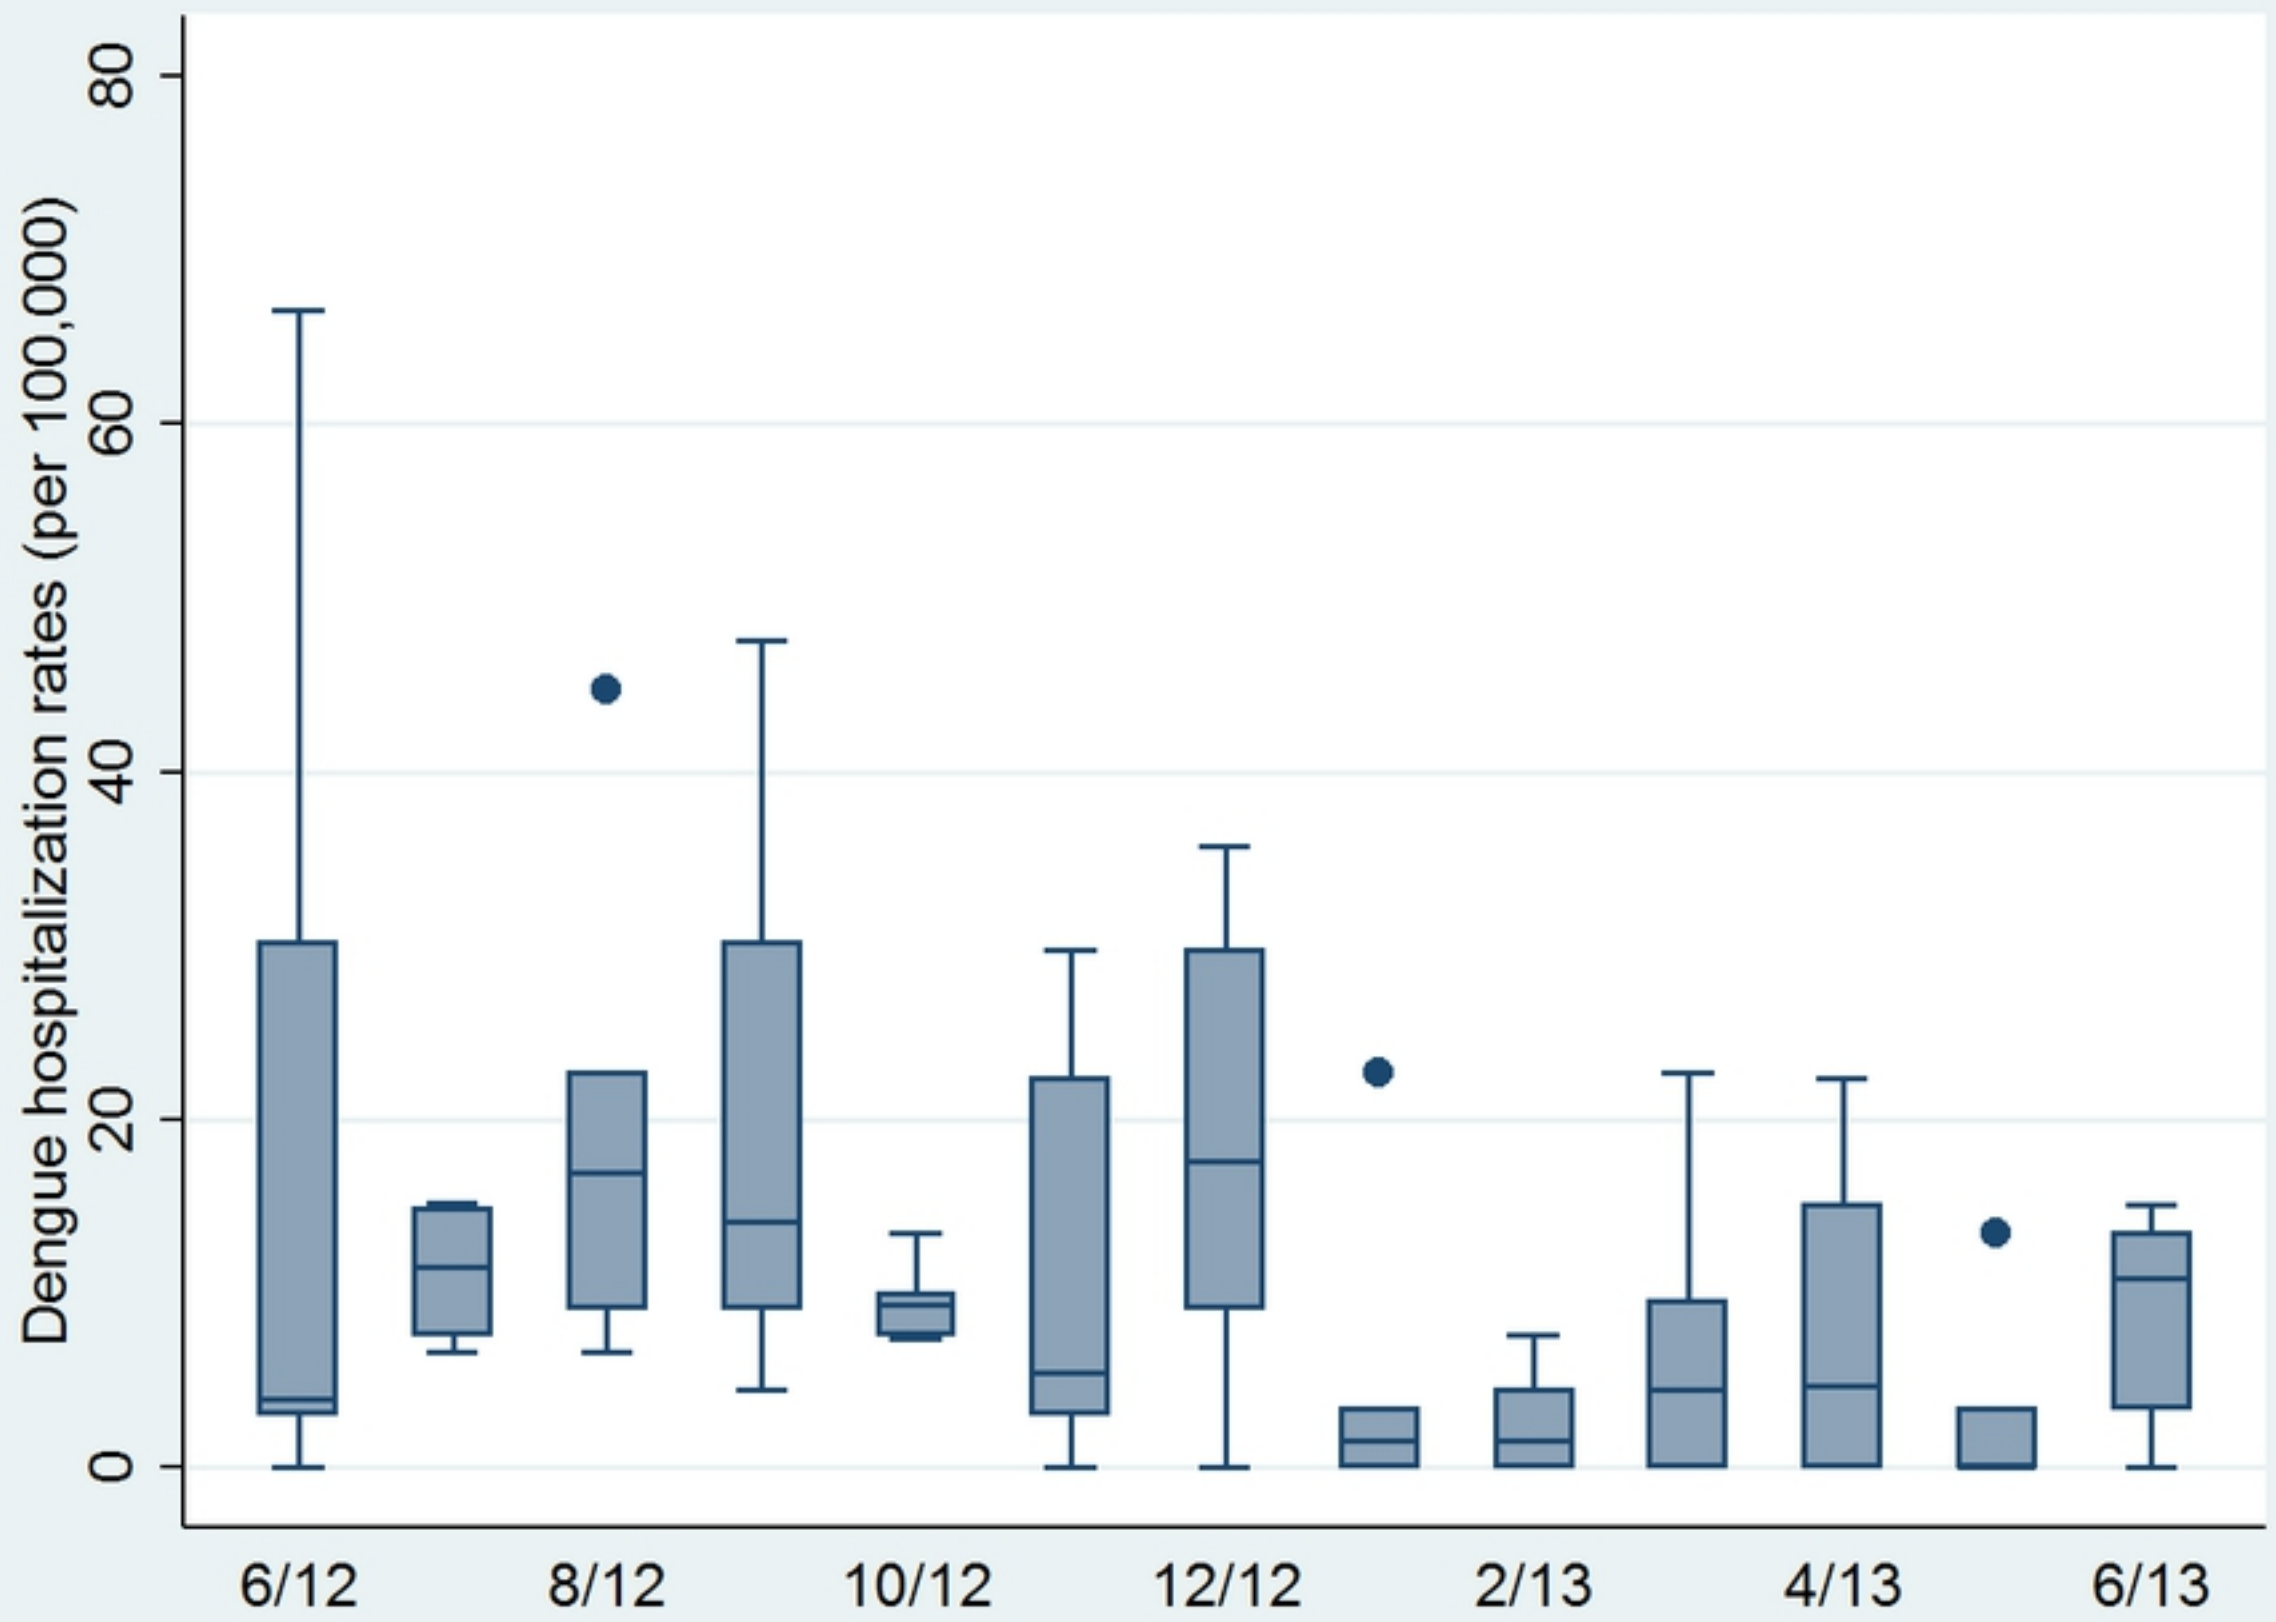

Fig4
